# Supplementary material
Source: publisher figshare collection journal article supplement (https://acs.figshare.com/ndownloader/files/3887794)
Supplement: Supplementary file 1 [file 3887794]

# Photocatalytic Antifouling Graphene Oxide-Mediated Hierarchical Filtration Membranes with Potential Applications on Water Purification

Chao Xu\*, Yuelian Xu and Jiaoli Zhu

Research Institute of Photocatalysis, State Key Laboratory of Photocatalysis on Energy and Environment, Fuzhou University, Fuzhou 350002, P. R. China

\* To whom correspondence should be addressed. E-mail: cxu@fzu.edu.cn

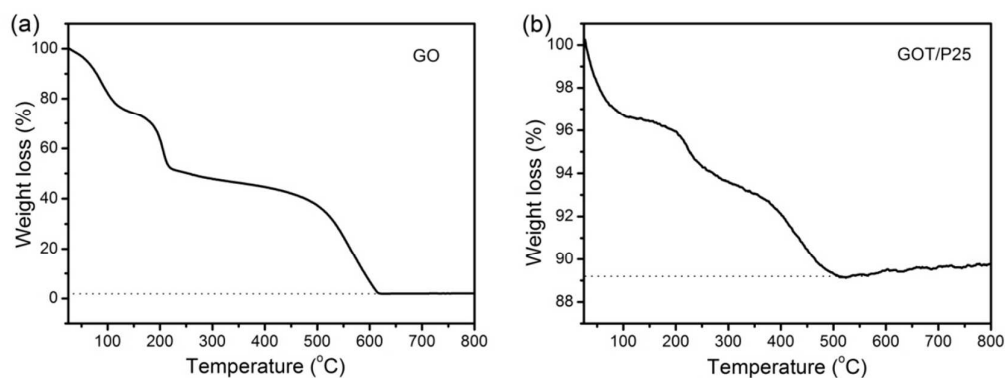

Figure S1. TG analysis of (a) GO and (b) GOT/P25

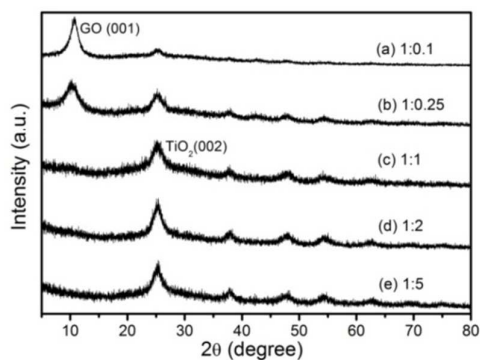

Figure S2. XRD patterns of GOT composite films with different weight ratios of GO and TiO<sub>2</sub>: (a)1:0.1, (b)1:0.25, (c)1:1, (d)1:2, (e)1:5

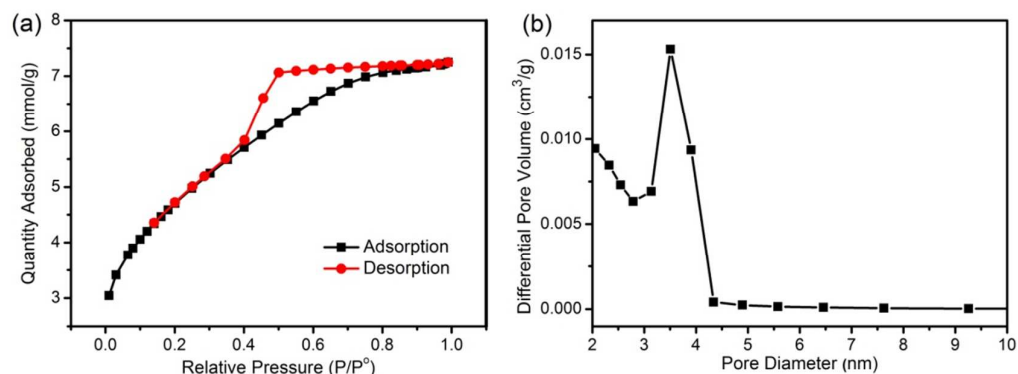

Figure S3. Nitrogen adsorption-desorption isotherms (a) and pore size distribution curve (b) of GOT

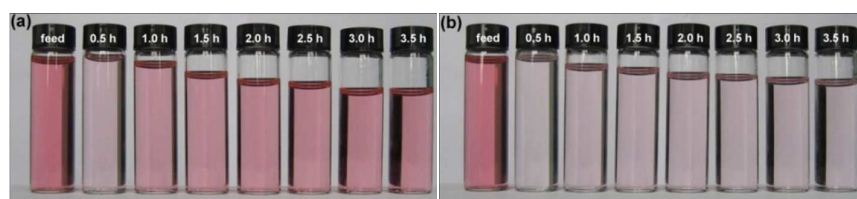

Figure S4. The digital photos of filtrate after DR 80 solution passing through GOT/P25 filtration membranes without (a) and with (b) UV light irradiation

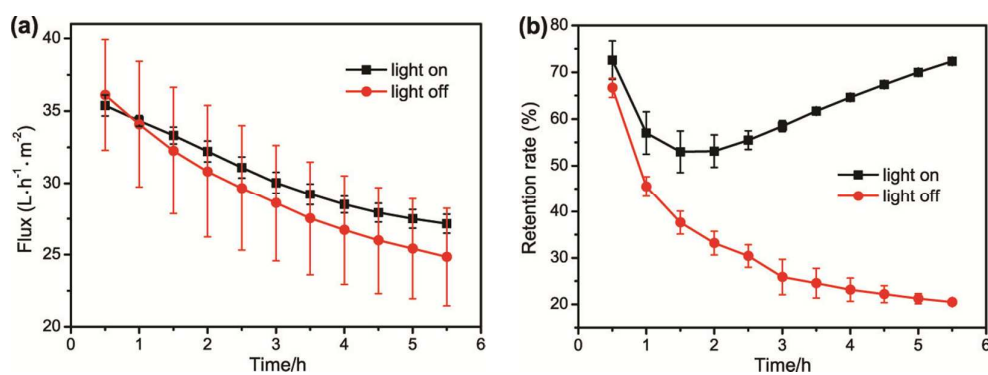

Figure S5. The flux (a) and retention rate (b) of GOT/P25 filtration membranes with and without UV light irradiation using Direct Blue15 as feed solution.

Table S1. The filtration performance of GO/P25 membranes using DR dye solution as feed for 30 min with/without UV light irradiation

| Entry | Sample | Light | DR solution (10 $\mu$ mol/L, 35 ml)                         |                    |
|-------|--------|-------|-------------------------------------------------------------|--------------------|
|       |        |       | Flux ( $\text{L} \cdot \text{h}^{-1} \cdot \text{m}^{-2}$ ) | Retention rate (%) |
| 1     | GO/P25 | Off   | $5.1 \pm 0.2$                                               | $97.7 \pm 1.5$     |
| 2     | GO/P25 | On    | $5.8 \pm 0.3$                                               | $98.1 \pm 2.2$     |

Table S2. The TOC values of filtrate after DR dye solution passing through GOT/P25 filtration membranes

| Time/h                                     |           | feed           | 0.5             | 1.0             | 1.5             | 2.0             | 2.5             | 3.0             | 3.5             |
|--------------------------------------------|-----------|----------------|-----------------|-----------------|-----------------|-----------------|-----------------|-----------------|-----------------|
| TOC<br>( $\text{mg} \cdot \text{L}^{-1}$ ) | Light off | $5.5 \pm 0.20$ | $0.98 \pm 0.11$ | $2.31 \pm 0.42$ | $2.49 \pm 0.28$ | $2.53 \pm 0.38$ | $2.5 \pm 0.38$  | $2.48 \pm 0.37$ | $2.5 \pm 0.41$  |
|                                            | Light on  |                | $1.0 \pm 0.21$  | $1.29 \pm 0.19$ | $1.41 \pm 0.0$  | $1.41 \pm 0.01$ | $1.41 \pm 0.02$ | $1.39 \pm 0.03$ | $1.44 \pm 0.06$ |
